# Supplementary material for: Readiness of health facilities to diagnose, manage, and prevent the Ebola epidemic along border districts in Southwestern Uganda
Source: Research Square preprint supplement (doi:10.21203/rs.3.rs-7666408/v1), 2025-10-17
Supplement: Supplementary file 1 [file e94e4ea78ef83a3b6dd0e77c.pdf]

**Readiness of health facilities to diagnose, manage, and prevent the Ebola epidemic along border districts in Southwestern Uganda**

**Interview Guide**

| <b>Demographics</b>      | <b>Response</b> |
|--------------------------|-----------------|
| Name of health facility  |                 |
| Level of health facility |                 |
| District                 |                 |

| <b>Elements for prevention</b>                                              | <b>Response<br/>(Available/Absent)</b> |
|-----------------------------------------------------------------------------|----------------------------------------|
| Have a facility-level committee/Ebola Task Force                            |                                        |
| Have identified, trained and designated an incident manager                 |                                        |
| Provide training for the rapid response teams                               |                                        |
| Tested coordination and operations through simulation exercises and drills. |                                        |
| Have infection prevention and control guidelines and SOPs.                  |                                        |
| Have basic hygiene, sanitation, disinfection, PPE, and other IPC services   |                                        |
| Train HCWs on IPC measures and waste management.                            |                                        |
| Have a basic isolation unit (e.g., two beds).                               |                                        |
| Disseminate simplified case definitions to staff and community.             |                                        |
| Train HCWs on case definitions and use of investigation forms.              |                                        |
| Contact tracing guidelines and SOPs available and disseminated to HCWs      |                                        |
| At least one trained team for contact tracing                               |                                        |

| <b>Elements for diagnosis</b>                                                      | <b>Response<br/>(Available/Absent)</b> |
|------------------------------------------------------------------------------------|----------------------------------------|
| Protocols for specimen collection and shipment.                                    |                                        |
| Train laboratory personnel on safe collection, packaging, labelling, and referral. |                                        |
| Access to immediate lines of reporting for potential EVD cases (dead or alive).    |                                        |
| Have a 24/7 hotline or existing emergency numbers to manage/receive alerts         |                                        |

| <b>Elements for management</b>                                                        | <b>Response<br/>(Available/Absent)</b> |
|---------------------------------------------------------------------------------------|----------------------------------------|
| Adequate supplies and isolation room(s) for suspected cases.                          |                                        |
| Identify and train clinical staff on EVD case management and IPC.                     |                                        |
| SOPs for safe and dignified burials                                                   |                                        |
| Train ambulance teams (if facility-managed ambulances) (n=12)                         |                                        |
| Equip at least one burial/decontamination team                                        |                                        |
| Ensure isolation structures have IPC facilities, waste management, water, and power.  |                                        |
| Identify suppliers of essential items (PPE, disinfectants, medical supplies).         |                                        |
| Have accessible contingency fund for immediate response to an EVD outbreak            |                                        |
| Identified funding sources and mechanisms to raise additional resources if necessary. |                                        |

**Facility Administrator**.....

**Interviewer**.....
